RESEARCH ARTICLE

# Suboptimal Serum $\alpha$ -Tocopherol Concentrations Observed among Younger Adults and Those Depending Exclusively upon Food Sources, NHANES 2003-2006<sup>1-3</sup>

Michael I. McBurney<sup>1\*</sup>, Elaine A. Yu<sup>2</sup>, Eric D. Ciappio<sup>1</sup>, Julia K. Bird<sup>3</sup>, Manfred Eggersdorfer<sup>4</sup>, Saurabh Mehta<sup>2</sup>

**1** DSM Nutritional Products, Parsippany, New Jersey, United States of America, **2** Division of Nutritional Sciences, Cornell University, Ithaca, New York, United States of America, **3** DSM Nutritional Products, Delft, The Netherlands, **4** DSM Nutritional Products, Kaiseraugst, Switzerland

\* [Michael.McBurney@dsm.com](mailto:Michael.McBurney@dsm.com)

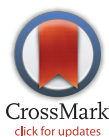

OPEN ACCESS

**Citation:** McBurney MI, Yu EA, Ciappio ED, Bird JK, Eggersdorfer M, Mehta S (2015) Suboptimal Serum  $\alpha$ -Tocopherol Concentrations Observed among Younger Adults and Those Depending Exclusively upon Food Sources, NHANES 2003-2006<sup>1-3</sup>. PLoS ONE 10(8): e0135510. doi:10.1371/journal.pone.0135510

**Editor:** Koyamangalath Krishnan, East Tennessee State University Quillen College of Medicine, UNITED STATES

**Received:** February 10, 2015

**Accepted:** July 23, 2015

**Published:** August 19, 2015

**Copyright:** © 2015 McBurney et al. This is an open access article distributed under the terms of the [Creative Commons Attribution License](http://creativecommons.org/licenses/by/4.0/), which permits unrestricted use, distribution, and reproduction in any medium, provided the original author and source are credited.

**Data Availability Statement:** Data are from the NHANES 2003-2004 and 2005-2006 laboratory data sets found at [http://www.cdc.gov/nchs/nhanes/nhanes\\_questionnaires.htm](http://www.cdc.gov/nchs/nhanes/nhanes_questionnaires.htm).

**Funding:** This statistical analysis of data collected by the Centers for Disease Control (CDC) (<http://www.cdc.gov/nutritionreport/faq.html>) was supported by DSM Nutritional Products, a manufacturer of vitamin E. MM, EC, JB and ME are employees of DSM Nutritional Products. DSM Nutritional Products

## Abstract

Vitamin E is an essential nutrient for human health, with an established function as a lipid-soluble antioxidant that protects cell membranes from free radical damage. Low vitamin E status has been linked to multiple health outcomes, including total mortality. With vitamin E being identified as a 'shortfall nutrient' because >90% of American adults are not consuming recommended amounts of vitamin E, we aimed to determine the prevalence of both clinical vitamin E deficiency (serum  $\alpha$ -tocopherol concentration < 12  $\mu\text{mol/L}$ ) and failure to meet a criterion of vitamin E adequacy, serum  $\alpha$ -tocopherol concentration of 30  $\mu\text{mol/L}$ , based on the Estimated Average Requirement (EAR) and lowest mortality rate in the Alpha-Tocopherol Beta-Carotene (ATBC) study. The most recent nationally-representative cross-sectional data (2003–2006) among non-institutionalized US citizens with available serum concentrations of  $\alpha$ -tocopherol from the National Health and Nutrition Examination Survey (NHANES); Centers for Disease Control and Prevention were analyzed. Serum  $\alpha$ -tocopherol distributions were compared between those reporting consumption of food without supplement use (FOOD) and food and supplement use (FOOD+DS) by sex, age, and race/ethnicity. Only 1% of the US population is clinically deficient. FOOD consumers have lower average  $\alpha$ -tocopherol levels ( $24.9 \pm 0.2 \mu\text{mol/L}$ ) than FOOD+DS users ( $33.7 \pm 0.3 \mu\text{mol/L}$ ), even when adjusted for total cholesterol. Using a criterion of adequacy of 30  $\mu\text{mol/L}$ , 87% of persons 20-30y and 43% of those 51+y had inadequate vitamin E status ( $p < 0.01$ ). A significant greater prevalence of FOOD compared to FOOD+DS users did not meet the criterion of adequacy which was based on the EAR and low ATBC mortality rate consistently across age, sex, and race/ethnic groups. The prevalence of inadequate vitamin E levels is significantly higher among non-users of dietary supplements. With declining usage of vitamin E supplements, the population should be monitored for changes in vitamin E status and related health outcomes.

provided support in the form of salaries for authors MM, EC, JB, and ME and as an unencumbered gift to Cornell University that was used to support EY as a graduate research assistant, but did not have any additional role in the study design, data collection and analysis, decision to publish, or preparation of the manuscript. The specific roles of these authors are articulated in the 'author contributions' section.

**Competing Interests:** The authors have the following interests: This study was supported by DSM Nutritional Products, a manufacturer of vitamins, including vitamin E, for food, dietary supplement, and pharmaceutical use. MM, EC, JB, and ME are employees of DSM Nutritional Products. There are no patents, products in development or marketed products to declare. This does not alter the authors' adherence to all the PLOS ONE policies on sharing data and materials.

## Introduction

Vitamin E ( $\alpha$ -tocopherol) is an antioxidant nutrient essential for health, first discovered in 1922 for its role in maintaining pregnancy in rodents [1]. The term vitamin E used in this publication refers to the 2R stereoisomer of  $\alpha$ -tocopherol used to establish recommended intakes [2]. As a fat-soluble antioxidant, the primary recognized function of vitamin E is to serve as a free radical scavenger in lipid components of the cell, such as cell membranes and plasma lipoproteins [2]. Clinical signs of vitamin E deficiency include erythrocyte hemolysis and peripheral neuropathy. While overt clinical deficiencies of vitamin E are rare [3], inadequate vitamin E intake has been linked to outcomes such as heart disease [4,5], impaired immune function [6,7], infertility [8,9], and even overall mortality [10]. Dietary intake of vitamin E from food is below recommendations [11–13]. In the United States, 83% of children [14] and 91% of adults [15] fail to consume the Estimate Average Requirement (EAR) for vitamin E from food alone. Because of the prevalence of inadequate vitamin E intake, the 2015 Dietary Guidelines Advisory Committee identified vitamin E as a shortfall nutrient.

For vitamin E, the EAR (12 mg/day; expected to result in a serum  $\alpha$ -tocopherol concentration of 27.9  $\mu\text{mol/L}$ ) is based on the  $\alpha$ -tocopherol concentration limiting *in vitro* hydrogen peroxide-induced erythrocyte hemolysis to  $\leq 12\%$ . Vitamin E deficiency is defined as serum  $\alpha$ -tocopherol concentration  $< 12 \mu\text{mol/L}$  [2]. Given the prevalence of inadequate vitamin E intake and limitations of dietary intake assessments [16], especially for vitamin E [17], we used serum  $\alpha$ -tocopherol data from the NHANES survey to assess vitamin E status according to the prevalence of vitamin E deficiency and the proportion of Americans failing to meet a criterion of vitamin E adequacy. Since functional markers for vitamin E adequacy are currently missing, the criterion of vitamin E adequacy was defined as 30  $\mu\text{mol/L}$ . This cutoff was chosen because 30  $\mu\text{mol/L}$  is the concentration associated with the EAR [18], the average serum concentration for American adults [11], the level at which urinary  $\alpha$ -CEHC excretion increases [12,17], and the concentration associated with the lowest mortality risk in the Alpha-Tocopherol Beta-Carotene (ATBC) study [10].

## Materials and Methods

This cross-sectional analysis included the most recent survey with nationally representative data for blood  $\alpha$ -tocopherol concentrations conducted by the National Center for Health Statistics (NCHS) at the Center for Disease Control and Prevention (CDC), i.e. NHANES 2003–2006. Details regarding the complex survey design and multistage probability sampling of non-institutionalized United States (US) civilians have been previously documented [3]. Supplement use was according to self-report of any vitamin, mineral, herbal or other dietary supplement consumed in the past month. Participants were shown a card with examples of supplements.

Data collection included blood samples [19] and interviews.

Serum  $\alpha$ -tocopherol concentrations were assessed by high performance liquid chromatography (HPLC) with multiwavelength photodiode-array absorbance detection [20]. Quantification of samples was based on external standards, and corrected by tocol as an internal standard to account for post-run recovery [21]. Total cholesterol was measured in serum or plasma by enzymatic coupled reactions; a reaction by-product ( $\text{H}_2\text{O}_2$ ) produced color and was quantified by assessing absorbance at 500 nm [22,23].

We considered a subsample of individuals with data available for  $\alpha$ -tocopherol, cholesterol, and covariates ( $n = 7,922$ ). NHANES (2003–2006) categorized race/ethnicity according to: 1) Mexican-American, 2) Other Hispanic, 3) Non-Hispanic White, 4) Non-Hispanic Black and 5) Other Race–Including Multi-Racial. Categories 2 and 5 were combined into a single “Other”

category. Age ranges were chosen to match Institute of Medicine groupings used for the Dietary Reference Intakes [2]. Exclusion criteria, i.e. pregnancy, lactation and age < 20 years, were modeled to facilitate comparisons with Ford et al. [11].

## Statistical analyses

All reported values accounted for the multi-stage complex survey design through survey procedures in SAS (version 9.3, Durham, NC, USA), as well as the sampling weight, cluster, and strata variables provided by NCHS. This methodology adjusts for non-coverage as well as non-response, and allows for the oversampling of under-represented groups. Sampling weights from each two-year survey (2003–04, 2005–06) were combined according to NCHS recommendations and proportionally scaled by the respective subsamples of individuals with available data from each survey.

To account for differences attributable to circulating blood cholesterol concentrations, cholesterol-adjusted  $\alpha$ -tocopherol values ( $\mu\text{mol}/\text{mmol}$ ) were calculated by dividing serum  $\alpha$ -tocopherol concentrations ( $\mu\text{mol}/\text{L}$ ) by total cholesterol ( $\text{mmol}/\text{L}$ ) [24]. Based on two cutoff values (<12, 30  $\mu\text{mol}/\text{L}$ ), serum  $\alpha$ -tocopherol concentration was dichotomized and low serum status was expressed as a percentage. In addition, a cholesterol-adjusted  $\alpha$ -tocopherol cutoff of 5.8  $\mu\text{mol}/\text{mmol}$  was also derived by dividing the criterion of  $\alpha$ -tocopherol adequacy (serum concentration of 30  $\mu\text{mol}/\text{L}$ ) by the desirable total blood cholesterol concentration (5.17  $\text{mmol}/\text{L}$ ; 200  $\text{mg}/\text{dL}$ ) recommended by the National Heart, Lung and Blood Institute [25]. Observations with missing values for cholesterol ( $n = 2$ ) were excluded from histograms and frequencies of cholesterol-adjusted  $\alpha$ -tocopherol.

Results for unadjusted- and cholesterol-adjusted  $\alpha$ -tocopherol concentrations were reported as totals and stratified by covariates, which were determined by *a priori* literature review. The proportions of the sample population with an  $\alpha$ -tocopherol concentration below 12 and 30  $\mu\text{mol}/\text{L}$  and a cholesterol-adjusted  $\alpha$ -tocopherol status below 5.8  $\mu\text{mol}/\text{mmol}$  were considered by subgroups. We stratified according to any self-reported supplement use, sex, race/ethnicity [non-Hispanic White, non-Hispanic Black, Mexican American, any other], and age groups ( $\geq 20$ –30,  $\geq 31$ –50, 51+ years). Individuals who self-identified as multi-racial, any other Hispanic (excluding Mexican American), or other races/ethnicities were included in the “any other” category. Age as a continuous variable was categorized into three groups.

Differences in proportions below cutoffs, stratified by subgroups (by supplement use, sex, race/ethnicity, age), were compared by Rao-Scott chi squared tests, which account for the complex survey design [26]. Accounting for familywise error rate, Rao-Scott chi square tests were considered significant with a Bonferroni correction (alpha value of 0.05 divided by four hypotheses). We assessed the association between supplement use and low vitamin E status (30  $\mu\text{mol}/\text{L}$ ) through multivariate logistic regression which accounts for the complex survey design (SAS surveylogistic procedure). The initial model included known and suspected risk factors or correlates of the outcome (based on *a priori* literature search) and two-way interaction terms between independent variables. Only variables with a p-value  $\leq 0.01$  were retained using a step-by-step elimination approach to reach the final parsimonious model.

## Results

A total of 7,922 participants with measurements of serum  $\alpha$ -tocopherol concentrations were included in this analysis. Distributions of serum concentrations of  $\alpha$ -tocopherol for the entire population were stratified by FOOD and FOOD+DS use (Fig 1). The mean ( $\pm$  SEM) of  $\alpha$ -tocopherol was  $29.6 \pm 0.2$ ,  $24.9 \pm 0.2$ ,  $33.7 \pm 0.3$   $\mu\text{mol}/\text{L}$  for the total population  $\geq 20$ y, FOOD and FOOD+DS use, respectively. The mean cholesterol-adjusted  $\alpha$ -tocopherol value was  $5.8 \pm$

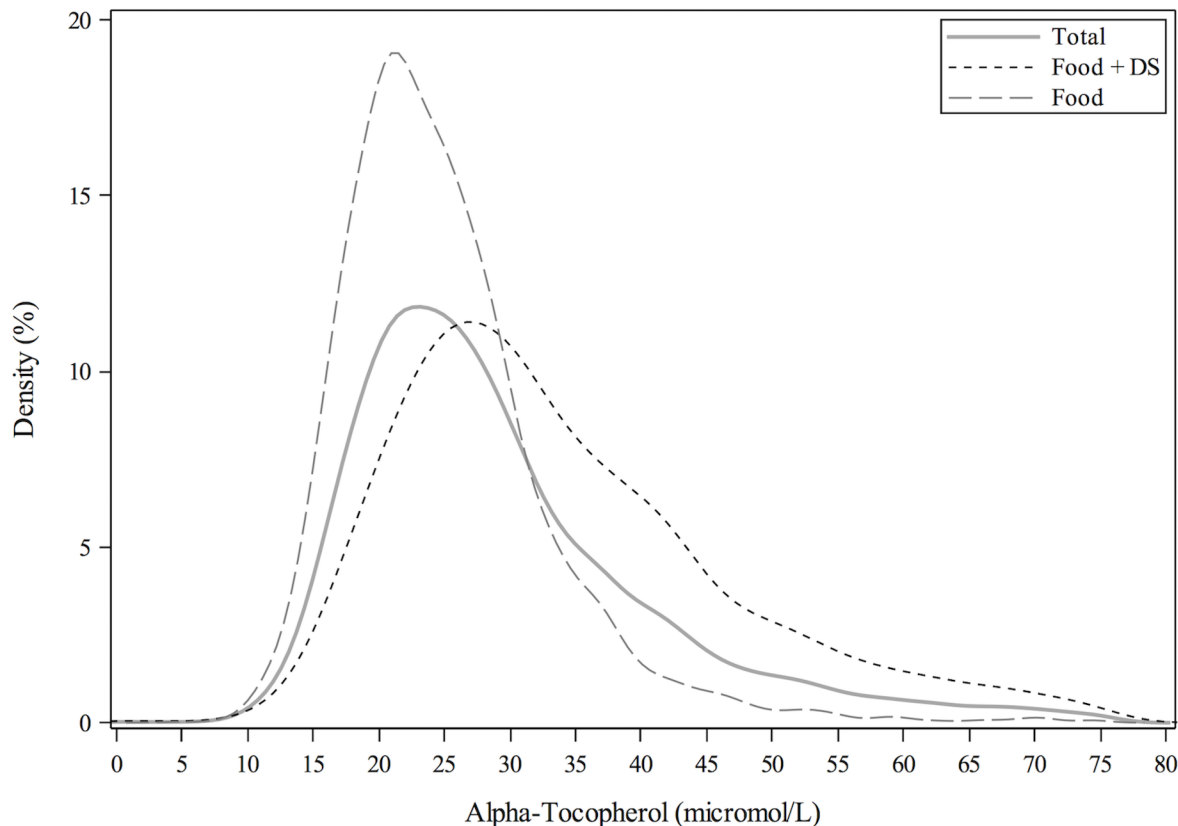

**Fig 1. Distribution of serum  $\alpha$ -tocopherol concentrations among individuals  $\geq 20$ y, excluding pregnant or lactating women, stratified by supplement use.** Lines represent density (as a percentage) through non-parametric kernel density estimation.

doi:10.1371/journal.pone.0135510.g001

$\leq 0.1$ ,  $4.9 \pm 0.1$ ,  $6.5 \pm 0.1$   $\mu\text{mol}/\text{mmol}$  for the total population  $\geq 20$ y, FOOD and FOOD+DS use, respectively (Fig 2). The mean  $\alpha$ -tocopherol for men  $\geq 20$ y was  $25.0 \pm 0.2$  and  $33.8 \pm 0.4$   $\mu\text{mol}/\text{L}$  and for women  $\geq 20$ y was  $24.9 \pm 0.2$  and  $33.7 \pm 0.3$   $\mu\text{mol}/\text{L}$  by FOOD and FOOD+DS use, respectively (Fig 3A and 3B). The mean  $\alpha$ -tocopherol was  $25.7 \pm 0.2$ ,  $35.7 \pm 0.5$   $\mu\text{mol}/\text{L}$  for Caucasians,  $23.5 \pm 0.3$ ,  $30.5 \pm 0.7$   $\mu\text{mol}/\text{L}$  African-Americans,  $25.1 \pm 0.2$ ,  $33.0 \pm 0.5$   $\mu\text{mol}/\text{L}$  for Mexican-Americans, and  $23.5 \pm 0.4$ ,  $30.7 \pm 0.6$   $\mu\text{mol}/\text{L}$  for all others  $\geq 20$ y by FOOD and FOOD+DS use, respectively (Fig 4).

Using the Institute of Medicine [2] definition of vitamin E deficiency, 12  $\mu\text{mol}/\text{L}$ , corresponding to  $<12\%$  hydrogen peroxide-induced *in vitro* erythrocyte lysis, only 0.6% of Americans are clinically deficient (Table 1). The prevalence of vitamin E deficiency did not differ with age, sex, or race/ethnicity. We further examined this dataset seeking to identify the prevalence of the population below the criterion of vitamin E adequacy, 30  $\mu\text{mol}/\text{L}$ , which was selected because it represents the concentration associated with the EAR [18], the average serum concentration for American adults [11], and the level at which urinary  $\alpha$ -CEHC excretion increases [12,17], and the concentration associated with the lowest mortality risk in the Alpha-Tocopherol Beta-Carotene (ATBC) study [10]. A greater prevalence of individuals not reporting supplement use had serum  $\alpha$ -tocopherol concentrations below 30  $\mu\text{mol}/\text{L}$  ( $p < 0.01$ ; Table 1). The prevalence of not meeting the criterion of vitamin E adequacy was higher among younger populations (Fig 5A). Over 87% of individuals between 20-30y had serum  $\alpha$ -tocopherol concentrations below 30  $\mu\text{mol}/\text{L}$  whereas 67.9% of those 31-50 and 43.1% of those 51+y were below the criterion of adequacy for vitamin E ( $p < 0.01$ ). Significantly more males (64.1%)

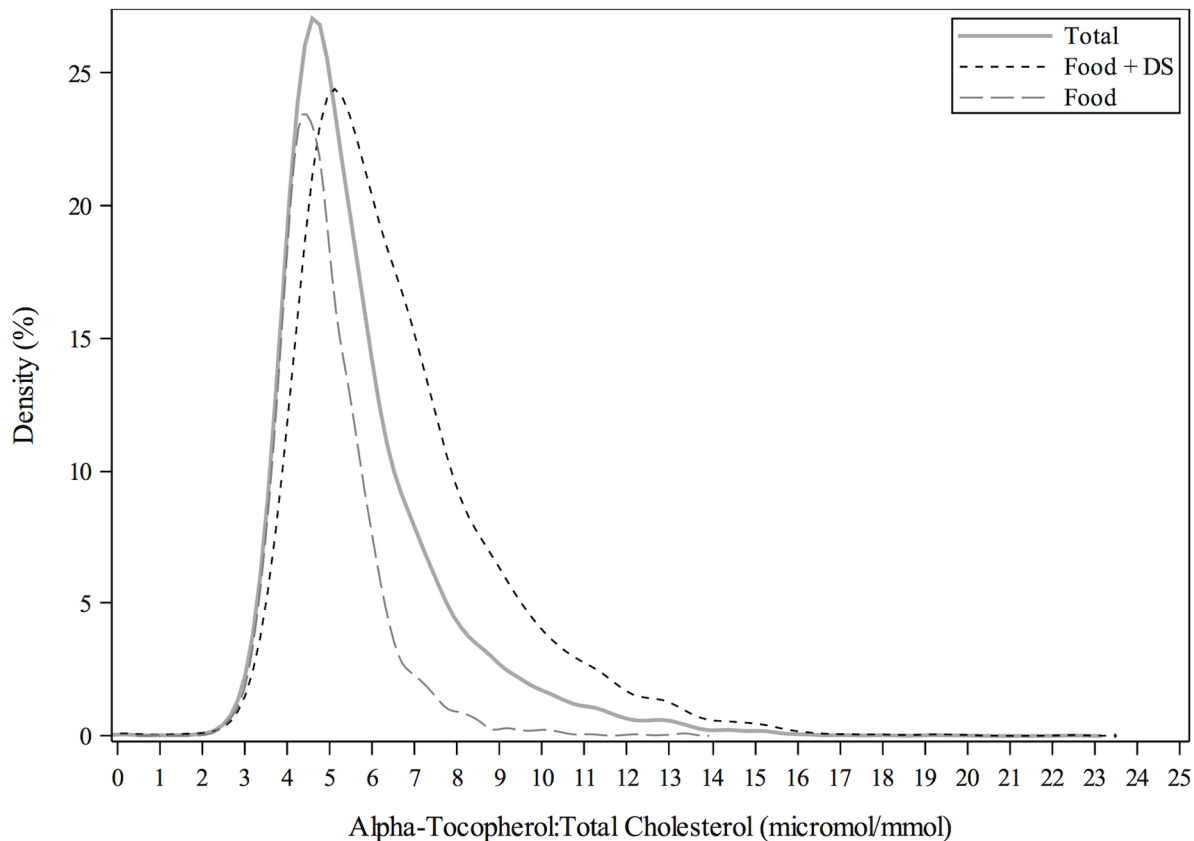

**Fig 2. Distribution of serum  $\alpha$ -tocopherol:total cholesterol concentrations among individuals  $\geq 20$ y, excluding pregnant or lactating women, stratified by supplement use.** Lines represent density (as a percentage) through non-parametric kernel density estimation.

doi:10.1371/journal.pone.0135510.g002

than females (61.0%) have serum  $\alpha$ -tocopherol levels below 30  $\mu\text{mol/L}$  ( $p < 0.01$ ; [Table 1](#)). There are race/ethnicity differences in vitamin E status with a higher prevalence of inadequate vitamin E status among non-Hispanic Blacks (77.5%) than Mexican Americans (62.2%), other races (71.9%) and the lowest prevalence in non-Hispanic whites (57.2%) ( $p < 0.01$ ; [Table 1](#)). In all cases (sex, race/ethnicity, age), a smaller proportion of FOOD+DS users failed to meet the criterion of vitamin E adequacy ([Table 1](#)). These trends remained similar when serum  $\alpha$ -tocopherol was adjusted for total cholesterol ([Table 2](#)). Use of supplements was associated with a reduced odds of low vitamin E status ( $< 30 \mu\text{mol/L}$ ; OR 0.17 [95% CI: 0.13–0.21]), adjusting for age, sex, race/ethnicity, and two-way interaction terms (supplement use \* age, sex \* age).

## Discussion

Using NHANES data collected between 2003–2006, we find the prevalence of clinical vitamin E deficiency to be low, which was similar to observations from the 1999–2000 NHANES dataset [11]. In this nationally representative survey of adults, serum  $\alpha$ -tocopherol concentrations ranged between greater than 0 and 84  $\mu\text{mol/L}$ . Cholesterol-adjusted  $\alpha$ -tocopherol values ranged between greater than 0 and 23  $\mu\text{mol/mmol}$ . Serum  $\alpha$ -tocopherol concentrations increased with age and supplement use, which has been observed by others [11,13,27]. Serum  $\alpha$ -tocopherol concentrations are significantly lower in adolescent girls (16  $\mu\text{mol/L}$ ) than premenopausal women (31  $\mu\text{mol/L}$ ) [28]. Higher vitamin E status in persons 51+y may partially be explained by increased dietary supplement usage [29]. A low vitamin E concentration is more prevalent

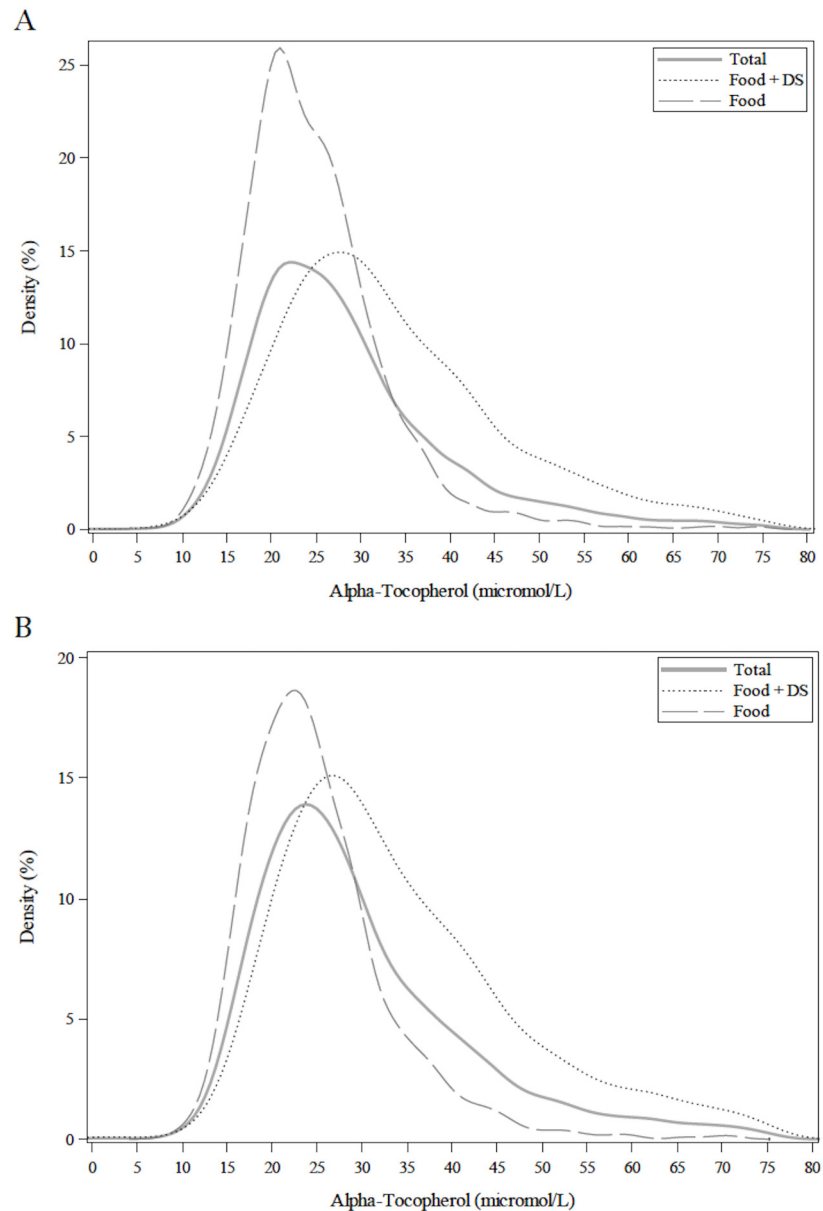

**Fig 3. Distribution of serum  $\alpha$ -tocopherol concentrations among individuals  $\geq 20$ y, excluding pregnant or lactating women, stratified by sex and supplement use. A. Males. B. Females. Lines represent density (as a percentage) through non-parametric kernel density estimation.**

doi:10.1371/journal.pone.0135510.g003

among African Americans and Mexican-Americans than in non-Hispanic Whites. This may be at least partly due to lower use of dietary supplements overall in ethnic minorities [30].

While overt deficiency was rare in this nationally representative population, the prevalence of not meeting the criterion of vitamin E adequacy was significantly higher among those reporting exclusive dependence upon food sources. This finding is consistent with reports that  $>90\%$  of children [14,31] and adults [13,15,31] consume less than the EAR for vitamin E from food sources.

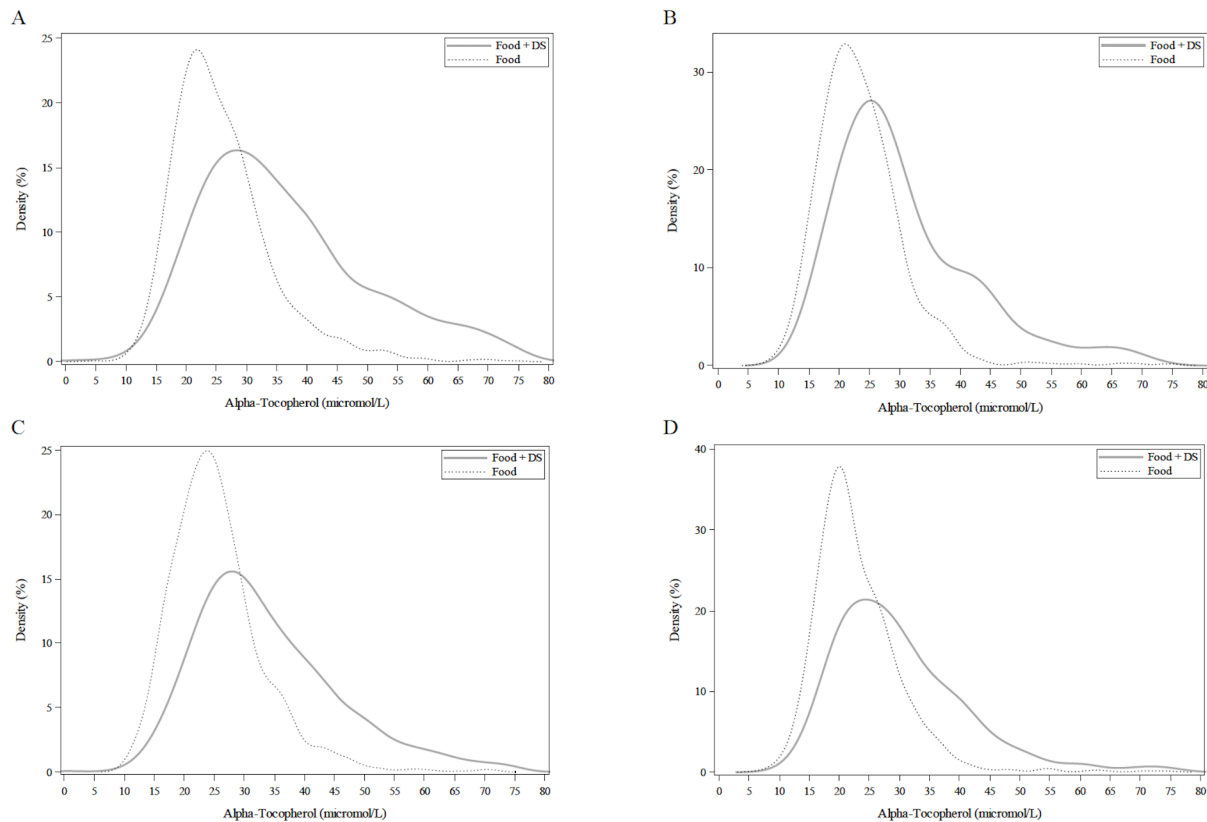

**Fig 4. Distribution of serum  $\alpha$ -tocopherol concentrations among individuals  $\geq 20$ y, excluding pregnant or lactating women, stratified by race-ethnicity and supplement.** A. Non-Hispanic White. B. Non-Hispanic Black. C. Mexican American. D. Other. Lines represent density (as a percentage) through non-parametric kernel density estimation.

doi:10.1371/journal.pone.0135510.g004

Dietary consumption of antioxidant rich foods is positively associated with increasing  $\alpha$ -tocopherol concentrations [32]. We and others [33] report that serum  $\alpha$ -tocopherol levels are lower in people depending exclusively upon dietary sources. Clearly, there is an opportunity for increased consumption of vitamin E rich foods such as nuts, oils, and whole grains or dietary supplement use. The conclusion of a 2005 meta-analysis was that vitamin E supplements should be avoided [34]. Although this meta-analysis reported higher mortality only for higher doses, data from the Nurses' Health Study and Health Professionals Follow-up Study reported the use of vitamin E supplements has declined  $\sim 50\%$  from 2002 to 2006 and to the lowest level (19.8% and 24.5%, respectively) since the early 1990s [35]. We propose that for many Americans, especially those relying exclusively upon food sources, that serum  $\alpha$ -tocopherol concentrations may not be adequate.

Vitamin E was first discovered for its role in supporting healthy pregnancy and development [1], the high prevalence of inadequate vitamin E status among men and women of reproductive age is concerning. According to global statistics, approximately 20–25% of couples have fertility problems [36]. Vitamin E insufficiency has been associated with impairments in spermatogenesis [37] and sperm competitiveness [38]. Men with higher dietary and supplement intakes of vitamin E have less sperm DNA damage [39]. Epidemiological data [8] has shown that infertile men had lower  $\alpha$ -tocopherol concentrations in both the sperm (1.48 vs 1.68  $\mu\text{mol/L}$ ) and serum (17.8 vs 22.0  $\mu\text{mol/L}$ ) compared to fertile males. In normospermic males with low fertilization rates, vitamin E supplementation decreased lipid peroxidation

**Table 1. Prevalences of serum  $\alpha$ -tocopherol concentrations below cut-offs (12 and 30  $\mu\text{mol/L}$ ) among individuals<sup>a</sup> in the United States (NHANES 2003–2006) (TOTAL), stratified by reported food use (FOOD), food and supplement use (FOOD+DS) and demographic characteristics (%).**

|                 | Total                        | Sex             |                 | p <sup>c</sup> | Race/Ethnicity     |                    |                  |                    | Age (y) |                 |                 | p <sup>c</sup>  |      |       |
|-----------------|------------------------------|-----------------|-----------------|----------------|--------------------|--------------------|------------------|--------------------|---------|-----------------|-----------------|-----------------|------|-------|
|                 |                              | Male            | Female          |                | Non-Hispanic White | Non-Hispanic Black | Mexican American | Other <sup>b</sup> | 20–30   | 31–50           | 51+             |                 |      |       |
|                 | <i>n</i> = 7922 <sup>a</sup> | <i>n</i> = 4084 | <i>n</i> = 3838 |                | <i>n</i> = 2864    | <i>n</i> = 929     | <i>n</i> = 2795  | <i>n</i> = 1334    |         | <i>n</i> = 1529 | <i>n</i> = 2785 | <i>n</i> = 3608 |      |       |
| <b>Total</b>    | <b>12</b>                    | 0.6             | 0.7             | 0.5            | 0.30               | 0.7                | 0.8              | 0.5                | 0.6     | 0.77            | 1.4             | 0.5             | 0.4  | 0.04  |
|                 | <b>30</b>                    | 62.5            | 64.1            | 61.0           | <0.01              | 57.2               | 77.5             | 62.2               | 71.9    | <0.01           | 87.4            | 67.9            | 43.1 | <0.01 |
|                 | <i>n</i> = 3873              | <i>n</i> = 1781 | <i>n</i> = 2092 |                | <i>n</i> = 1484    | <i>n</i> = 347     | <i>n</i> = 1481  | <i>n</i> = 561     |         | <i>n</i> = 521  | <i>n</i> = 1182 | <i>n</i> = 2170 |      |       |
| <b>FOOD +DS</b> | <b>12</b>                    | 0.4             | 0.2             | 0.5            | 0.07               | 0.6                | 0.0              | 0.3                | <0.1    | —               | 0.8             | 0.5             | 0.2  | 0.23  |
|                 | <b>30</b>                    | 45.9            | 45.7            | 46.0           | 0.89               | 39.6               | 61.0             | 47.3               | 57.4    | <0.01           | 79.2            | 54.0            | 28.5 | <0.01 |
|                 | <i>n</i> = 4049              | <i>n</i> = 2303 | <i>n</i> = 1746 |                | <i>n</i> = 1380    | <i>n</i> = 582     | <i>n</i> = 1314  | <i>n</i> = 773     |         | <i>n</i> = 1008 | <i>n</i> = 1603 | <i>n</i> = 1438 |      |       |
| <b>FOOD</b>     | <b>12</b>                    | 0.9             | 1.2             | 0.6            | 0.02               | 0.8                | 1.2              | 0.8                | 1.1     | 0.82            | 1.8             | 0.5             | 0.7  | 0.10  |
|                 | <b>30</b>                    | 81.3            | 80.4            | 82.3           | 0.13               | 78.7               | 87.2             | 81.2               | 84.3    | <0.01           | 92.7            | 80.8            | 71.2 | <0.01 |

<sup>a</sup> Sample size (*n* = 7,922) excludes individuals: <20 years; who are pregnant lactating; with  $\alpha$ -tocopherol concentrations >99 percentile; or unavailable data for  $\alpha$ -tocopherol concentration, age, sex, race-ethnicity. To account for complex survey design, SAS survey procedures (surveymeans) as well as cluster, strata, and sampling weights (proportionally scaled to included sample) were used.

<sup>b</sup> Includes multi-racial and any other Hispanic individuals

<sup>c</sup> Based on Rao-Scott chi-square p-value

doi:10.1371/journal.pone.0135510.t001

levels in sperm from 12.6 to 7.8 nmol malondialdehyde per 10<sup>8</sup> spermatozoa [40], implying improvements in sperm viability. In women, low vitamin E status may contribute to the rising use of *in vitro* fertilization to become pregnant [9]. Increased production of biomarkers of oxidative stress have been associated with acute pregnancy complications or spontaneous abortion [41]. Vitamin E supplementation (400 IU daily) improved endometrial response during controlled ovarian stimulation in women with unexplained infertility [42]. Finally, pre-eclampsia is associated with significantly lower serum vitamin E levels [43]. More research is needed to understand the role of vitamin E status on reproductive success in men and women.

Low vitamin E status has been associated with age-related changes in brain function [44,45]. Beydoun et al. [46] examined the relationship of antioxidant status with depressive symptoms in US adults 20–85y and found lower serum levels of vitamins E (26 vs 30  $\mu\text{mol/L}$ ) and C (43 vs 60  $\mu\text{mol/L}$ ) as well as all carotenoids in depressed vs non-depressed counterparts. Maes et al. [47] reported lower vitamin E concentrations ( $\approx$ 23  $\mu\text{mol/L}$ ) in American individuals with major depression vs normal volunteers ( $\approx$ 32  $\mu\text{mol/L}$ ), as did a separate Australian cohort [48]. Healthy controls had  $\alpha$ -tocopherol levels > 30  $\mu\text{mol/L}$  whereas those with Alzheimer’s had an average < 30  $\mu\text{mol/L}$  [44]. These studies suggest that suboptimal vitamin E status may negatively affect health.

In elderly men with comparable average serum  $\alpha$ -tocopherol concentrations ( $\sim$ 30  $\mu\text{mol/L}$ ), each standard deviation decrease in serum  $\alpha$ -tocopherol concentration was associated with increased risks of hip fracture and any fracture [49]. Men with baseline serum  $\alpha$ -tocopherol levels averaging 30  $\mu\text{mol/L}$  had a 10% lower risk of developing prostate cancer compared to those at 18.6  $\mu\text{mol/L}$  [50].

A 2008 review by Traber et al. [51] notes that male smokers from the Alpha-Tocopherol, Beta-Carotene Cancer Prevention (ATBC) Study with the lowest serum  $\alpha$ -tocopherol quintile had significantly higher risk of total and cause-specific mortality than those in the highest quintile [52]. The median baseline  $\alpha$ -tocopherol level was 26.7  $\mu\text{mol/L}$  in the ATBC Study with



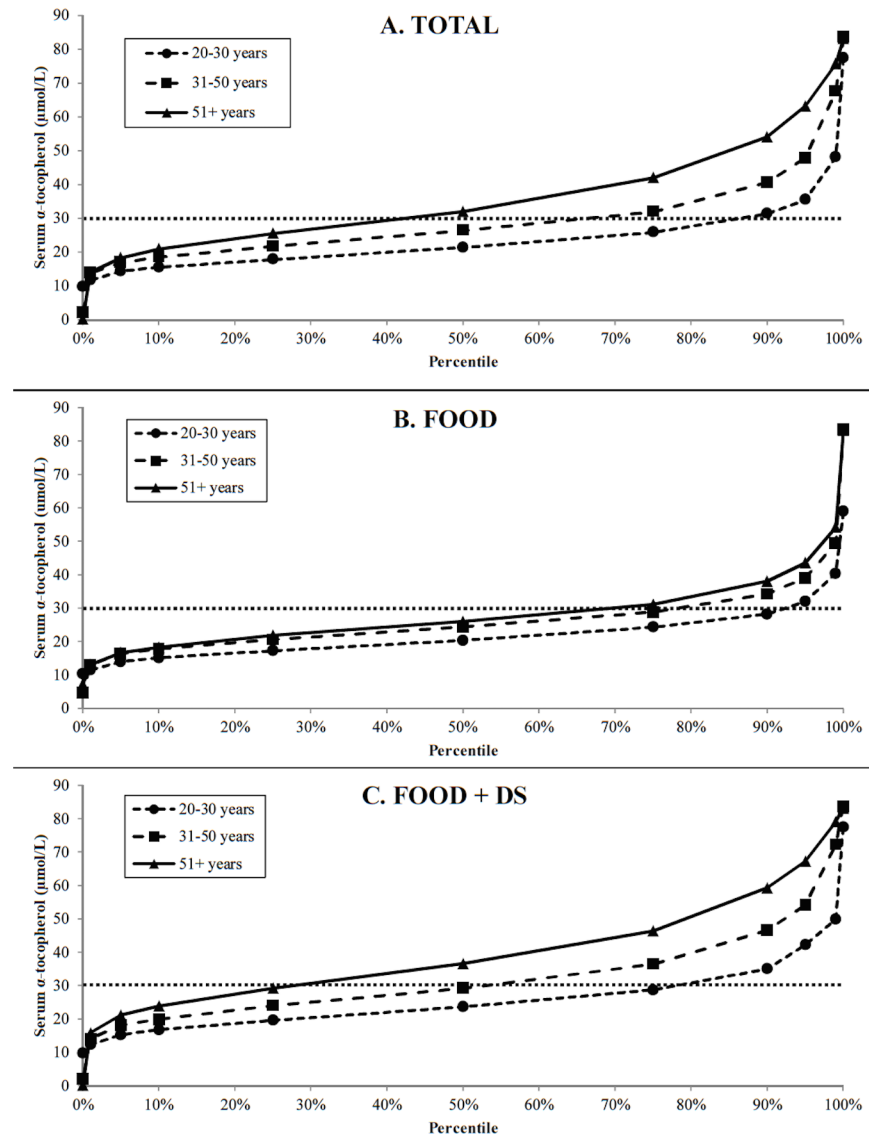

**Fig 5. Proportion (%) of adults  $\geq 20$ y at or below the serum  $\alpha$ -tocopherol concentration shown on the Y-axis, excluding pregnant or lactating women, for the total population and by supplement use. The dotted horizontal line represents a criterion of adequacy set at 30  $\mu\text{mol/L}$ .**

doi:10.1371/journal.pone.0135510.g005

20<sup>th</sup> and 80<sup>th</sup> percentiles of 21.6 and 33  $\mu\text{mol/L}$ , respectively. Basically, three quarters of ATBC volunteers had  $\alpha$ -tocopherol concentrations below 30  $\mu\text{mol/L}$  and lower than the average baseline value reported in reviews of vitamin E supplementation RCTS [34,53,54] (S1 Appendix). This indicates that most vitamin E intervention trials tested the effects of supplementation in persons with baseline serum  $\alpha$ -tocopherol concentrations, i.e. 30  $\mu\text{mol/L}$  that are higher than concentrations associated with the EAR. In summary, >80% of adult FOOD and 61% of FOOD+DS consumers fail to reach the criterion of vitamin E adequacy associated with the EAR. Similar concentrations have been reported in Irish adults [13].

A strength of this study is that it is a nationally representative sampling of serum  $\alpha$ -tocopherol concentrations of Americans. A weakness is that a single time point blood sample does not necessarily reflect long-term vitamin E status any more than it does for vitamin D. For decades,

**Table 2. Prevalences of cholesterol-adjusted serum  $\alpha$ -tocopherol concentrations below cut-off (5.8  $\mu\text{mol}/\text{mmol}$ ) among individuals in the United States (NHANES 2003–2006) (TOTAL), stratified by reported food use (FOOD), food and supplement use (FOOD+DS) and demographic characteristics (%).**

|                     | Total             |       | Sex              |                    | $p^d$ | Race/Ethnicity                        |                                      |                                 |                                | $p^d$ | Age (y) |                   |                   | $p^d$ |                 |
|---------------------|-------------------|-------|------------------|--------------------|-------|---------------------------------------|--------------------------------------|---------------------------------|--------------------------------|-------|---------|-------------------|-------------------|-------|-----------------|
|                     | Total<br>n        | $p^b$ | Male<br>n = 4083 | Female<br>n = 3837 |       | Non-<br>Hispanic<br>White<br>n = 2863 | Non-<br>Hispanic<br>Black<br>n = 929 | Mexican<br>American<br>n = 2794 | Other <sup>c</sup><br>n = 1334 |       | $p^d$   | 20–30<br>n = 1528 | 31–50<br>n = 2785 |       | 51+<br>n = 3607 |
|                     |                   |       |                  |                    |       |                                       |                                      |                                 |                                |       |         |                   |                   |       |                 |
| <b>TOTAL</b>        | 7920 <sup>a</sup> | 64.7  | 64.6             | 62.8               | 0.04  | 59.7                                  | 78.8                                 | 62.1                            | 72.9                           | <0.01 | 83.4    | 70.5              | 45.4              | 0.01  |                 |
| <b>FOOD<br/>+DS</b> | 3872              | 44.9  | 43.5             | 47.4               | 0.04  | 40.3                                  | 60.6                                 | 46.4                            | 56.7                           | <0.01 | 71.2    | 54.9              | 29.9              | <0.01 |                 |
| <b>FOOD</b>         | 4048              | 83.7  | 83.4             | 84.7               | 0.29  | 83.3                                  | 89.6                                 | 82.1                            | 86.9                           | 0.02  | 91.4    | 84.9              | 75.4              | <0.01 |                 |

<sup>a</sup> Serum  $\alpha$ -tocopherol ( $\mu\text{mol}/\text{L}$ ) divided by total cholesterol ( $\text{mmol}/\text{L}$ ). Cut-off value (5.8  $\mu\text{mol}/\text{mmol}$ ) based on American Heart Association recommendation of desirable total cholesterol level (<200 mg/dL).

<sup>b</sup> Sample size (n = 7,920) excludes individuals: <20 years; who were pregnant or lactating; with  $\alpha$ -tocopherol concentrations >99 percentile; or unavailable data for  $\alpha$ -tocopherol concentration, age, sex, race/ethnicity, total cholesterol. To account for complex survey design, SAS survey procedures (surveymeans) as well as cluster, strata, and sampling weights (proportionally scaled to included sample) were used.

<sup>c</sup> Includes multi-racial and any other Hispanic individuals

<sup>d</sup> Based on Rao-Scott chi-square p-value

doi:10.1371/journal.pone.0135510.t002

health professionals denied the need to investigate the role of vitamin D and health outcomes because the prevalence of rickets, i.e. vitamin D deficiency, was low. It is unlikely that vitamin D supplementation will benefit individuals with optimal vitamin D levels [55,56]. Similarly, the role of vitamin E status in maintaining health should not be judged by supplementation studies in individuals with optimal (>30  $\mu\text{mol}/\text{L}$ ) baseline  $\alpha$ -tocopherol levels [34,53,54] (S1 Appendix). Research is needed that correlates serum  $\alpha$ -tocopherol concentrations with functional outcomes.

## Conclusion

Our findings provide evidence that most Americans have serum  $\alpha$ -tocopherol levels below 30  $\mu\text{mol}/\text{L}$ . The EAR, epidemiological and randomized controlled studies all indicate that maintaining a serum  $\alpha$ -tocopherol concentration of 30  $\mu\text{mol}/\text{L}$  may have beneficial effects on mortality, cognitive function and reproduction. Given the prevalence of inadequate vitamin E status among those exclusively dependent upon food and decreasing use of vitamin E supplements since these samples were obtained (NHANES 2003–2006), it will be important to continue monitoring vitamin E status in Americans. This paper corroborates the need for research regarding to assessing serum  $\alpha$ -tocopherol concentrations with respect to functional markers and health outcomes.

## Supporting Information

**S1 Appendix. Baseline vitamin E ( $\alpha$ -tocopherol,  $\mu\text{mol}/\text{L}$ ) concentrations reported in research summarized in 3 published meta-analyses.**  
(DOCX)

## Acknowledgments

The choice of variables ( $\alpha$ -tocopherol concentrations, sex, age, ethnicity/race) to be analyzed from the CDC dataset was jointly decided by all authors. EY and SM downloaded the CDC

dataset, conducted independent statistical analysis, and prepared the tables and figures. MM wrote the manuscript with input from co-authors. All authors read and approved the final manuscript. A special thank you to Elisabeth Stoecklin for helping MM collate the serum  $\alpha$ -tocopherol concentrations reported in [S1 Appendix](#).

## Author Contributions

Conceived and designed the experiments: MM SM. Analyzed the data: EY SM. Wrote the paper: MM EY EC JB ME SM.

## References

1. Niki E, Traber MG (2012) A history of vitamin E. *Ann Nutr Metab* 61: 207–212. doi: [10.1159/000343106](#) PMID: [23183290](#)
2. IOM (2000) Dietary Reference Intakes for Vitamin C, Vitamin E, Selenium, and Carotenoids.
3. CDC (2012) Second National Report on Biochemical Indicators of Diet and Nutrition in the U.S. Population 2012. Atlanta, GA: National Center for Environmental Health.
4. Levy AP, Friedenber P, Lotan R, Ouyang P, Tripputi M, Higginson L, et al. (2004) The effect of vitamin therapy on the progression of coronary artery atherosclerosis varies by haptoglobin type in postmenopausal women. *Diab Care* 27: 925–930.
5. Vardi M, Blum S, Levy AP (2012) Haptoglobin genotype and cardiovascular outcomes in diabetes mellitus—natural history of the disease and the effect of vitamin E treatment. Meta-analysis of the medical literature. *Eur J Intern Med* 23: 628–632. doi: [10.1016/j.ejim.2012.04.009](#) PMID: [22939808](#)
6. Han SN, Meydani SN (2006) Impact of vitamin E on immune function and its clinical implications. *Expert Rev Clin Immunol* 2: 561–567. doi: [10.1586/1744666X.2.4.561](#) PMID: [20477613](#)
7. Pae M, Meydani SN, Wu D (2012) The role of nutrition in enhancing immunity in aging. *Aging Dis* 3: 91–129. PMID: [22500273](#)
8. Benedetti S, Tagliamonte MC, Catalani S, Primiterra M, Canestrari F, stefani SD, et al. (2012) Differences in blood and semen oxidative status in fertile and infertile men, and their relationship with sperm quality. *Reprod BioMed Online* 25: 300–306. doi: [10.1016/j.rbmo.2012.05.011](#) PMID: [22818093](#)
9. Ozkaya MO, Naziroglu M (2010) Multivitamin and mineral supplementation modulates oxidative stress and antioxidant vitamin levels in serum and follicular fluid of women undergoing in vitro fertilization. *Fertil Steril* 94: 2465–2466. doi: [10.1016/j.fertnstert.2010.01.066](#) PMID: [20226443](#)
10. Wright ME, Lawson KA, Weinstein SJ, Pietinen P, Taylor PR, Virtamo J, et al. (2006) Higher baseline serum concentrations of vitamin E are associated with lower total and cause-specific mortality in the Alpha-Tocopherol, Beta-Carotene Cancer Prevention Study. *Am J Clin Nutr* 84: 1200–1207. PMID: [17093175](#)
11. Ford E, Schleicher R, Mokdad A, Ajani U, Liu S (2006) Distribution of serum concentrations of  $\alpha$ -tocopherol and  $\gamma$ -tocopherol in the US population. *Am J Clin Nutr* 84: 375–383. PMID: [16895886](#)
12. Biesalski HK, Böhles H, Esterbauer H, Fürst P, Gey F, Hunsdorfer G, et al. (1997) Antioxidant vitamins in prevention. *Clin Nutr* 16: 151–155. PMID: [16844591](#)
13. Zhao Y, Monahan FJ, McNulty BA, Gibney MJ, Gibney ER (2014) Effect of vitamin E intake from food and supplement sources on plasma alpha- and gamma-tocopherol concentrations in a healthy Irish adult population. *Br J Nutr* 112: 1575–1585. doi: [10.1017/S0007114514002438](#) PMID: [25245834](#)
14. Bailey RL, Fulgoni VL 3rd, Keast DR, Lentino CV, Dwyer JT (2012) Do dietary supplements improve micronutrient sufficiency in children and adolescents? *J Pediatr* 161: 837–842. doi: [10.1016/j.jpeds.2012.05.009](#) PMID: [22717218](#)
15. Fulgoni VL 3rd, Keast DR, Bailey RL, Dwyer JT (2011) Foods, fortificants, and supplements: Where do Americans get their nutrients? *J Nutr* 141: 1847–1854. doi: [10.3945/jn.111.142257](#) PMID: [21865568](#)
16. Peter S, M U., P S., E M., Weber P (2013) The challenge of setting appropriate intake recommendations for vitamin E: Considerations of status and functionality to define nutrient requirements. *Int J Vitam Nutr Res* 83: 129–136. doi: [10.1024/0300-9831/a000153](#) PMID: [24491886](#)
17. Lebold KM, Ang A, Traber MG, Arab L (2012) Urinary alpha-carboxyethyl hydroxychroman can be used as a predictor of alpha-tocopherol adequacy, as demonstrated in the Energetics Study. *Am J Clin Nutr* 96: 801–809. PMID: [22952171](#)
18. Traber MG, Stevens JF (2011) Vitamins C and E: beneficial effects from a mechanistic perspective. *Free Radic Biol Med* 51: 1000–1013. doi: [10.1016/j.freeradbiomed.2011.05.017](#) PMID: [21664268](#)

19. NCHS Laboratory Procedures Manual. National Center for Health Statistics. Available: [http://www.cdc.gov/nchs/data/nhanes/\\_05\\_06/lab.pdf](http://www.cdc.gov/nchs/data/nhanes/_05_06/lab.pdf)
20. NCHS Laboratory Procedure Manual for Fat Soluble Micronutrients: (Vitamins A, E, and Carotenoids) —UV-visible Detection. National Center for Health Statistics. Available: [http://www.cdc.gov/nchs/data/nhanes/nhanes\\_05\\_06/vitaec\\_d\\_met\\_aecar.pdf](http://www.cdc.gov/nchs/data/nhanes/nhanes_05_06/vitaec_d_met_aecar.pdf)
21. NCHS Laboratory Procedure Manual for Fat Soluble Micronutrients (Vitamins A, E, and Carotenoids). National Center for Health Statistics. Available: [http://www.cdc.gov/nchs/data/nhanes/nhanes\\_03\\_04/l45vit\\_c\\_met\\_vitAE\\_carotenoids.pdf](http://www.cdc.gov/nchs/data/nhanes/nhanes_03_04/l45vit_c_met_vitAE_carotenoids.pdf)
22. NCHS Laboratory Procedure Manual for Total Cholesterol. National Center for Health Statistics. Available: [http://www.cdc.gov/nchs/data/nhanes/nhanes\\_05\\_06/tchol\\_d\\_met\\_h717.pdf](http://www.cdc.gov/nchs/data/nhanes/nhanes_05_06/tchol_d_met_h717.pdf)
23. NCHS Laboratory Procedure Manual for Total Cholesterol, HDL-Cholesterol, Triglycerides, and LDL-Cholesterol. National Center for Health Statistics. Available: [http://www.cdc.gov/nchs/data/nhanes/nhanes\\_03\\_04/l13\\_c\\_met\\_lipids.pdf](http://www.cdc.gov/nchs/data/nhanes/nhanes_03_04/l13_c_met_lipids.pdf)
24. Thurnham DI, Davies JA, Crump BJ, Situnayake RD, Davis M (1986) The Use of Different Lipids to Express Serum Tocopherol: Lipid Ratios for the Measurement of Vitamin E Status. *Annals Clin Biochem* 23: 514–520.
25. NHLBI N (2005) High Blood Cholesterol: What you need to know. NIH Publication No 05–3290: U.S. Department of Health and Human Services.
26. NCHS Task 3b: How to Perform Chi-Square Test Using SAS Survey Procedures.
27. Pfeiffer CM, Sternberg MR, Schleicher RL, Haynes BM, Rybak ME, Pirkle JL et al. (2013) The CDC's Second National Report on Biochemical Indicators of Diet and Nutrition in the U.S. Population is a valuable tool for researchers and policy makers. *J Nutr* 143: 938S–947S. doi: [10.3945/jn.112.172858](https://doi.org/10.3945/jn.112.172858) PMID: [23596164](https://pubmed.ncbi.nlm.nih.gov/23596164/)
28. Chai W, Novotny R, Maskarinec G, Marchand LL, Franke AA, Cooney RV, et al. (2014) Serum Coenzyme Q10,  $\alpha$ -Tocopherol,  $\gamma$ -Tocopherol, and C-Reactive Protein Levels and Body Mass Index in Adolescent and Premenopausal Females. *J AM Coll Nutr* 33: 192–197. doi: [10.1080/07315724.2013.862490](https://doi.org/10.1080/07315724.2013.862490) PMID: [24809382](https://pubmed.ncbi.nlm.nih.gov/24809382/)
29. Bailey RL, Gahche JJ, Lentino CV, Dwyer JT, Engel JS, Thomas PR, et al. (2011) Dietary supplement use in the United States, 2003–2006. *J Nutr* 141: 261–266. doi: [10.3945/jn.110.133025](https://doi.org/10.3945/jn.110.133025) PMID: [21178089](https://pubmed.ncbi.nlm.nih.gov/21178089/)
30. Gahche J, Bailey R, Burt V, Hughes J, Yetley E, Dwyer J, et al. (2011) Dietary supplement use among U.S. adults has increased since NHANES III (1988–1994). *NCHS Data Brief*: 1–8.
31. HHS/USDA (2015) Scientific Report of the 2015 Dietary Guidelines Advisory Committee. Health and Human Services and United States Department of Agriculture.
32. Khalil A, Gaudreau P, Cherki M, Wagner R, Tessier DM, Fulop T, et al. (2011) Antioxidant-rich food intakes and their association with blood total antioxidant status and vitamin C and E levels in community-dwelling seniors from the Quebec longitudinal study NuAge. *Exp Gerontol* 46: 475–481. doi: [10.1016/j.exger.2011.02.002](https://doi.org/10.1016/j.exger.2011.02.002) PMID: [21316439](https://pubmed.ncbi.nlm.nih.gov/21316439/)
33. Schleicher RL, Sternberg MR, Pfeiffer CM (2013) Race-ethnicity is a strong correlate of circulating fat-soluble nutrient concentrations in a representative sample of the U.S. population. *J Nutr* 143: 966S–976S. doi: [10.3945/jn.112.172965](https://doi.org/10.3945/jn.112.172965) PMID: [23596163](https://pubmed.ncbi.nlm.nih.gov/23596163/)
34. Miller ER, Pastor-Barriuso R, Dalal D, Riemersma RA, Appel LJ, Guallar E. (2005) Meta-Analysis: High-Dosage Vitamin E Supplementation May Increase All-Cause Mortality. *Annals Intern Med* 142: 37–46.
35. Kim HJ, Giovannucci E, Rosner B, Willett WC, Cho E (2014) Longitudinal and Secular Trends in Dietary Supplement Use: Nurses' Health Study and Health Professionals Follow-Up Study, 1986–2006. *J Acad Nutr Diet*.
36. Menezo Y, Evenson D, Cohen M, Dale B (2014) Effect of antioxidants on sperm genetic damage. *Adv Exp Med Biol* 791: 173–189. doi: [10.1007/978-1-4614-7783-9\\_11](https://doi.org/10.1007/978-1-4614-7783-9_11) PMID: [23955679](https://pubmed.ncbi.nlm.nih.gov/23955679/)
37. Aitken RJ, Clarkson JS (1987) Cellular basis of defective sperm function and its association with the genesis of reactive oxygen species by human spermatozoa. *J Reprod Fertil* 81: 459–469. PMID: [2828610](https://pubmed.ncbi.nlm.nih.gov/2828610/)
38. Almbro M, Dowling DK, Simmons LW (2011) Effects of vitamin E and beta-carotene on sperm competitiveness. *Ecol Lett* 14: 891–895. doi: [10.1111/j.1461-0248.2011.01653.x](https://doi.org/10.1111/j.1461-0248.2011.01653.x) PMID: [21749600](https://pubmed.ncbi.nlm.nih.gov/21749600/)
39. Schmid TE, Eskenazi B, Marchetti F, Young S, Weldon RH, Baumgartner A, et al. (2012) Micronutrients intake is associated with improved sperm DNA quality in older men. *Fertil Steril* 98: 1130–1137 e1131. doi: [10.1016/j.fertnstert.2012.07.1126](https://doi.org/10.1016/j.fertnstert.2012.07.1126) PMID: [22935557](https://pubmed.ncbi.nlm.nih.gov/22935557/)

40. Geva E, Bartoov B, Zabludovsky N, Lessing JB, Lerner-Geva L, Amit A. (1996) The effect of antioxidant treatment on human spermatozoa and fertilization rate in an in vitro fertilization program. *Fertil Steril* 66: 430–434. PMID: [8751743](#)
41. Ruder EH, Hartman TJ, Blumberg J, Goldman MB (2008) Oxidative stress and antioxidants: exposure and impact on female fertility. *Hum Reprod Update* 14: 345–357. doi: [10.1093/humupd/dmn011](#) PMID: [18535004](#)
42. Cicek N, Eryilmaz OG, Sarikaya E, Gulerman C, Genc Y (2012) Vitamin E effect on controlled ovarian stimulation of unexplained infertile women. *J Assist Reprod Genet* 29: 325–328. doi: [10.1007/s10815-012-9714-1](#) PMID: [22302530](#)
43. Siddiqui IA, Jaleel A, Al'Kadri HM, Akram S, Tamimi W (2013) Biomarkers of oxidative stress in women with pre-eclampsia. *Biomark Med* 7: 229–234. doi: [10.2217/bmm.12.109](#) PMID: [23547818](#)
44. Mangialasche F, Westman E, Kivipelto M, Muehlboeck JS, Cecchetti R, Baglioni M, et al. (2013) Classification and prediction of clinical diagnosis of Alzheimer's disease based on MRI and plasma measures of alpha-/gamma-tocotrienols and gamma-tocopherol. *J Intern Med* 273: 602–621. doi: [10.1111/joim.12037](#) PMID: [23343471](#)
45. Dysken MW, Guarino PD, Vertrees JE, Asthana S, Sano M, Llorente M, et al. (2014) Vitamin E and memantine in Alzheimer's disease: Clinical trial methods and baseline data. *Alzheimers Dement* 10: 36–44. doi: [10.1016/j.jalz.2013.01.014](#) PMID: [23583234](#)
46. Beydoun MA, Beydoun HA, Boueiz A, Shroff MR, Zonderman AB (2013) Antioxidant status and its association with elevated depressive symptoms among US adults: National Health and Nutrition Examination Surveys 2005–6. *Br J Nutr* 109: 1714–1729. doi: [10.1017/S0007114512003467](#) PMID: [22935166](#)
47. Maes M, De Vos N, Pioli R, Demedts P, Wauters A, Neels H, et al. (2000) Lower serum vitamin E concentrations in major depression. Another marker of lowered antioxidant defenses in that illness. *J Affect Disord* 58: 241–246. PMID: [10802134](#)
48. Owen AJ, Batterham MJ, Probst YC, Grenyer BF, Tapsell LC (2005) Low plasma vitamin E levels in major depression: diet or disease? *Eur J Clin Nutr* 59: 304–306. PMID: [15508016](#)
49. Michaelsson K, Wolk A, Byberg L, Arnlov J, Melhus H (2014) Intake and serum concentrations of alpha-tocopherol in relation to fractures in elderly women and men: 2 cohort studies. *Am J Clin Nutr* 99: 107–114. doi: [10.3945/ajcn.113.064691](#) PMID: [24225359](#)
50. Weinstein SJ, Wright ME, Lawson KA, Snyder K, Mannisto S, Taylor PR, et al. (2007) Serum and dietary vitamin E in relation to prostate cancer risk. *Cancer Epidemiol Biomarkers Prev* 16: 1253–1259. PMID: [17548693](#)
51. Traber MG, Frei B, Beckman JS (2008) Vitamin E revisited: do new data validate benefits for chronic disease prevention? *Curr Opin Lipidol* 19: 30–38. doi: [10.1097/MOL.0b013e3282f2dab6](#) PMID: [18196984](#)
52. ATBC (1994) The Effect of Vitamin E and Beta Carotene on the Incidence of Lung Cancer and Other Cancers in Male Smokers. *NEJM* 330: 1029–1035. PMID: [8127329](#)
53. Biesalski HK, Grune T, Tinz J, Zollner I, Blumberg JB (2010) Reexamination of a meta-analysis of the effect of antioxidant supplementation on mortality and health in randomized trials. *Nutrients* 2: 929–949. doi: [10.3390/nu2090929](#) PMID: [22254063](#)
54. Abner EL, Schmitt FA, Mendiondo MS, Marcum JL, Kryscio RJ (2011) Vitamin E and all-cause mortality: a meta-analysis. *Curr Aging Sci* 4: 158–170. PMID: [21235492](#)
55. Lappe JM, Heaney RP (2012) Why randomized controlled trials of calcium and vitamin D sometimes fail. *Dermatoendocrinol* 4: 95–100. doi: [10.4161/derm.19833](#) PMID: [22928064](#)
56. Heaney RP (2014) Guidelines for optimizing design and analysis of clinical studies of nutrient effects. *Nutr Rev* 72: 48–54.
